# Supplementary material
Source: Research Square preprint supplement (doi:10.21203/rs.3.rs-9012942/v1)
Supplement: Supplementary file 1 [file 9a702e6bca76be367e615054.docx]

Institutional Drug Information Dissemination in Ghana: Barriers, Enablers, and System-Level Insights

**Interview Guide**

**Notes to data collectors**:

- Introduce yourself and explain the purpose of the study.
- Assure the participant of confidentiality
- Obtain consent for recording.

**Preamble:**

Health technologies encompass a broad range of tools, equipment, procedures, and processes that are used in the delivery of healthcare. These innovations are integral to the functioning and efficiency of healthcare systems, significantly influencing prevention, diagnosis, treatment, and management of diseases and health conditions. Health technologies include, but are not limited to medical devices, pharmaceuticals,Medical Procedures and Techniques**,** Information and Communication Technologies (ICTs) in Health**,** Public Health Interventions**.**

**Section 1: Background and General Views on Information Dissemination on health technologies:**

1. **Context and relevance**:
2. Can you please tell me about your role and experience in the healthcare sector in Ghana?
   - **Follow-up Probe**: How long have you been involved with drug information dissemination?
3. How would you describe the current state of drug information dissemination in Ghana?

- **Follow-up Probe**: What do you think are the strengths of the current drug information mechanism?
- **Follow-up Probe**: What are the main weaknesses you have observed, of the current drug information mechanism?

1. In your opinion, how important is effective information dissemination on new technologies for healthcare in Ghana?

- **Follow-up Probe**: Can you provide specific examples where good information dissemination has made a difference?

**Section 2: Barriers to Effective Information Dissemination on health technologies including drugs**

1. **Structural Barriers:**
2. What structural barriers do you think hinder the effective dissemination of information on health technologies (drug information)?

- **Follow-up Probe:** Are there issues related to the infrastructure or organizational setup that affect dissemination?
- **Follow-up Probe:** Are there issues related to the infrastructure or organizational setup that affect dissemination to health professionals **in the hospital and the general public**?

1. **Functional Barriers**:
2. What functional challenges have you encountered or are aware of in the drug information dissemination process?

- **Follow-up Probe:** How do these challenges impact the day-to-day operations of drug information units?

1. **Policy and Strategic Barriers:**
2. How effective do you think current policies and strategies are in supporting drug information dissemination?

- **Follow-up Probe:** Are there any specific policies and or strategies that you believe need revision or improvement?

**Section 3: Solutions and Strategies for Improvement**

1. **Existing Solutions:**
2. Can you think of any successful initiatives or strategies that have been implemented to improve information dissemination on new health technologies? Please describe.

- **Follow-up Probe:** What factors contributed to the success of these initiatives?
- **Follow-up Probe:** Can you share any data or outcomes that demonstrate the impact of these strategies?

1. **Potential Solutions:**
2. What solutions or strategies do you believe could address the existing barriers to effective information dissemination on health technologies?

- **Follow-up Probe:** How do you think these solutions could be implemented in the current healthcare context in Ghana?
- **Follow-up Probe:** How do you think these solutions could be implemented for **new health technologies in** particular in the current healthcare context in Ghana?
- **Follow-up Probe:** What steps should be taken immediately and in the long term to ensure a robust and functional system?

1. **Stakeholder Involvement:**
2. How can different stakeholders be better involved in improving in information dissemination on health technologies?

- **Follow-up Probe:** What roles should healthcare professionals, policymakers, and the general public play in this process?
- **Follow-up Probe:** What roles should healthcare professionals, policymakers, and the general public play in this process, when it’s a new health technology?

**Closing**

- Is there anything else you would like to add that we haven't discussed regarding drug information dissemination in Ghana?
- Thank the participant for their time and valuable insights.
